# Supplementary material for: LD-SAFE: laser dismantling environmental and safety assessment
Source: Copernicus journal article supplement (doi:10.5194/sand-1-27-2021), 2021-11-10
Supplement: Supplementary file 1 [file sand-1-27-2021-supplement.pdf]

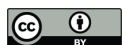

*Supplement of*

## **LD-SAFE: laser dismantling environmental and safety assessment**

**Damien Roulet et al.**

*Correspondence to:* Damien Roulet (droulet@onet.fr) and Pierre Daguin (pdaguin@onet.fr)

The copyright of individual parts of the supplement might differ from the article licence.

# LD-SAFE

## BASE symposium (safeND)

### Project presentation

Author: ONET TECHNOLOGIES

Date: Nov. 12, 2021

*This project has received funding from the Euratom research and training programme 2019-2020 under grant agreement No 945255*

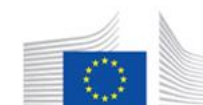

European  
Commission

Horizon 2020  
European Union funding  
for Research & Innovation

# LD-SAFE

## Summary

### CONTENT

1. INTRODUCTION
2. CUTTING TECHNIQUES
3. LASER CUTTING
4. LD-SAFE
5. SAFETY ASPECTS
6. CONCLUSION

## Decommissioning of a power reactor

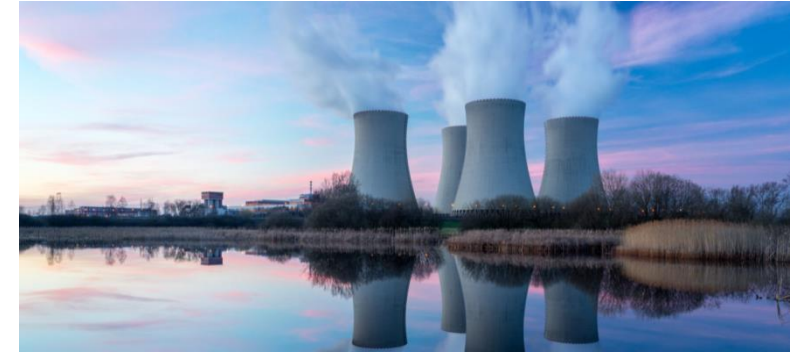

- Commonly scheduled to be completed over a **long period (over 20 years for PWR/BWR in general)**
- Change in strategy (**immediate dismantling** after permanent shutdown)
- **New challenges** (acceleration of the decommissioning project schedules)
- Need to improve the **dismantling processes** and **existing techniques**

➤ **Key operation to improve: cutting of Reactor Pressure Vessel and Internals**

# LD-SAFE

## Cutting techniques

## Main categories / Main tools used

- Thermal cutting (Plasma Arc Cutting)
- Mechanical cutting (Band Saw Cutting)
- Hydraulic cutting (Abrasive Water Jet Cutting)

## Comparison / Limitations

### Plasma Arc cutting

Large dimensions  
Fast  
Less maintenance on site

#### High degree of filtration

Slower underwater  
Electrically conductive material

### Band Saw cutting

Cut large thicknesses  
All materials  
Limited contamination

#### Slow (cutting speed)

Maintenance  
Wear part replacement

### Abrasive Water Jet cutting

Complicated shape  
All materials  
Few air pollution

#### Water treatment

High cost  
Required space

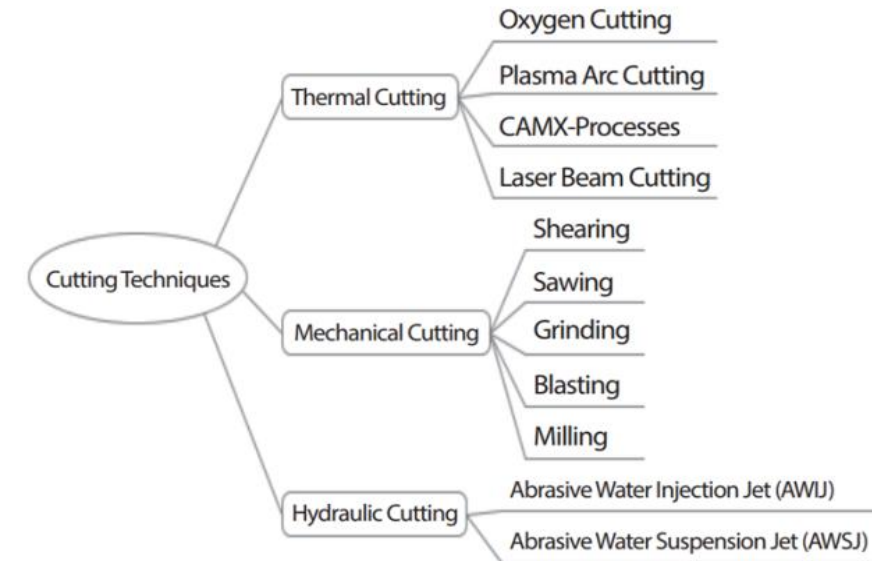

*Classification of remote handling technologies*

## Advantages

## Drawbacks

*For cutting RPV/RVI in-air and underwater*

# LD-SAFE

## Cutting techniques

## Need

- Development of **innovative technologies**
- Improve **safety, radiation protection, waste management, time and cost** aspects

## Why adapting laser cutting technology for RPV and RVI?

- **Key benefits** in comparison with conventional cutting techniques
- More than **10 years of R&D (laboratory testing)**
- **Mature and operational technology** for dismantling activities (already used for fuel cycle / research facilities)

## Examples of operational experience

- Dissolvers of **UP1 MAR200** fuel reprocessing facility at CEA in France
- Piping at Creys-Malville NPP (**SUPERPHENIX** prototype fast reactor)
- Radioactive waste evaporator at **La Hague** site

# LD-SAFE

## Laser cutting

### Key benefits for dismantling

- **Safe** for the workers (remote operations)
- **Time** reduction and **cost** efficiency in operation
- **Effortless** cutting with high performance
- Ability to cut **complex geometries**
- **Minimization of the secondary waste** (aerosols and mass removed)
- **Cleaner** than most of other thermal techniques (especially for dust & fumes)
- **Robustness** and **reliability**, **no maintenance** or wear parts in controlled area

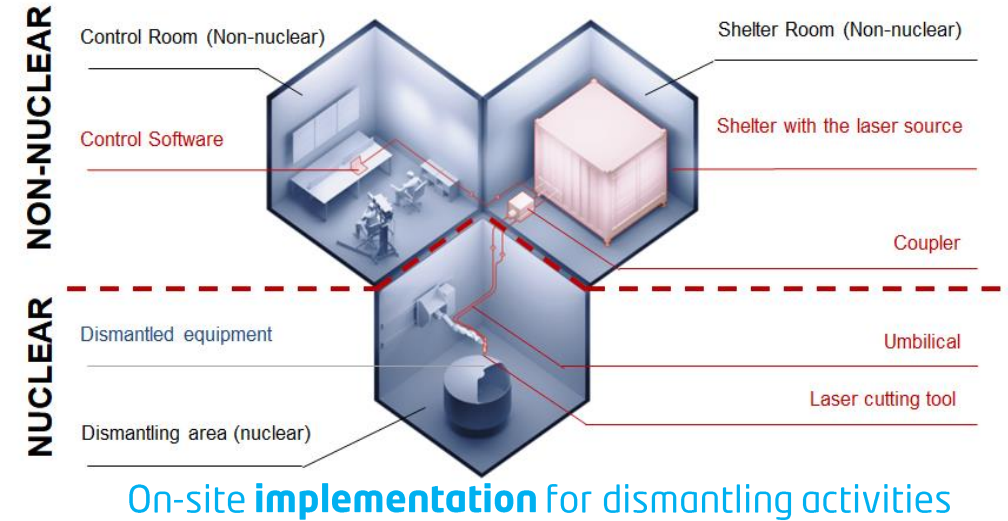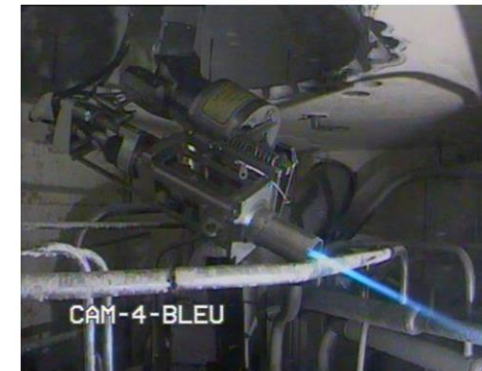

Up to **200mm in thickness**  
in air (14kW laser power)

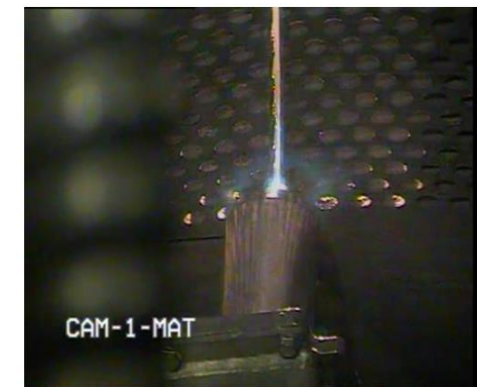

## Not yet widely used in the nuclear decommissioning industry?

- Laser considered as new technology (**never used** for power nuclear reactor dismantling)
- Compliance with **safety requirements** need to be checked

## Most challenging task

- Dismantling Reactor Pressure Vessels and Internals (**RPV and RVI**) of Power Nuclear Reactor

## LD-SAFE (H2020 program)

- To promote the use of laser cutting technology for dismantling PWR and BWR (the most used in Europe)

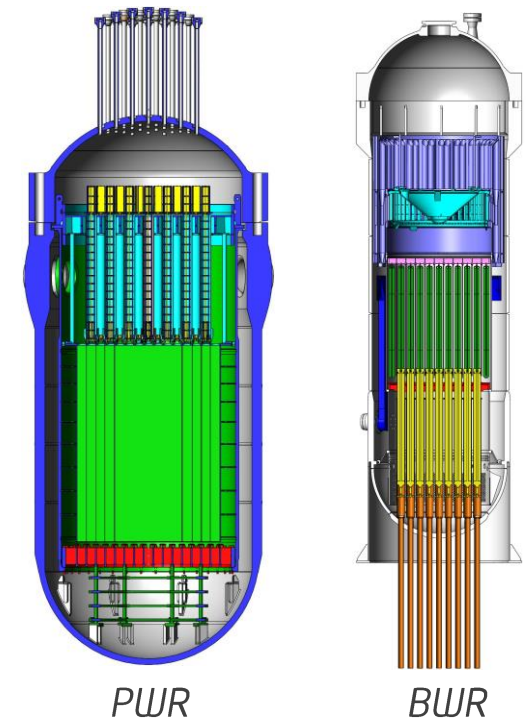

## H2020 program

- R + D + i project
- Funding by **EC (Euratom)**
- **4 years** (July 2020 to June 2024)

## Consortium

|                            |                                                                                     |
|----------------------------|-------------------------------------------------------------------------------------|
| ONET TECHNOLOGIES - France |    |
| EQUANS (ENGIE) - Belgium   |    |
| CEA - France               |   |
| VYSUS GROUP - Sweden       |  |
| IRSN - France              |  |
| TECNATOM - Spain           |  |

## Overall organization

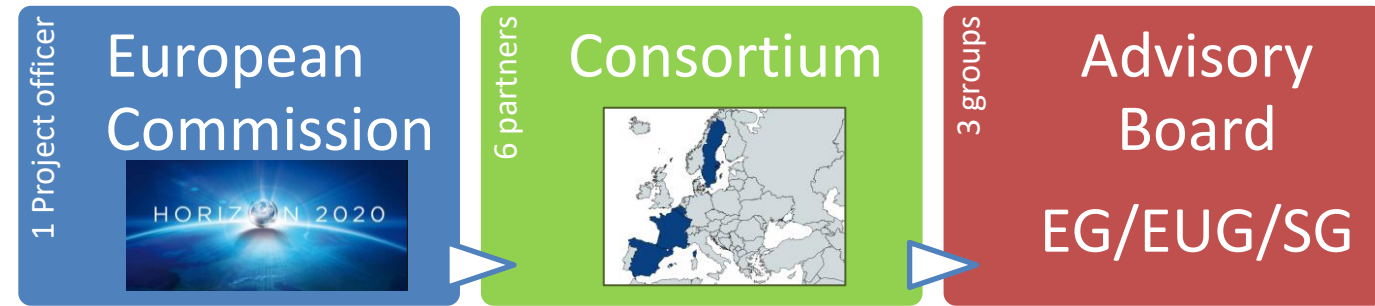

Expert Group (EG)  
End User Group (EUG)  
Support Group (SG)

## End User Group

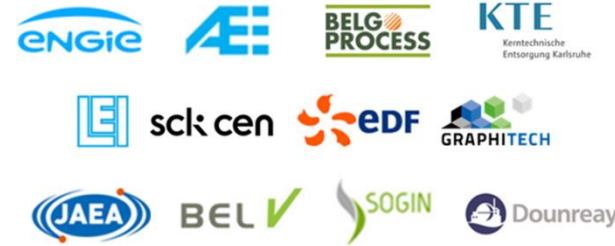

## Support Group

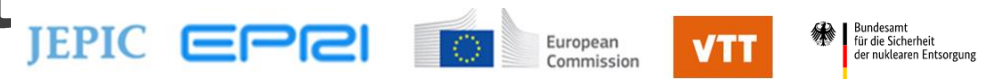

## Main objectives

To demonstrate in-air and underwater technical capabilities, safety, economic advantages and suitability for power nuclear reactor dismantling activities.

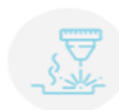

**Objective 1:** Demonstration of the capabilities of a versatile laser cutting solution to address key technical challenges in large NPPs decommissioning.

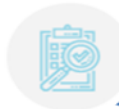

**Objective 2:** Environmental and safety assessment of the implementation of laser cutting for nuclear reactor decommissioning.

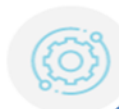

**Objective 3:** Technical validation of the laser cutting prototype in operational environment.

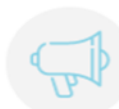

**Objective 4:** Demonstration of the economic advantage of using laser cutting technology for the forthcoming reactor decommissioning market.

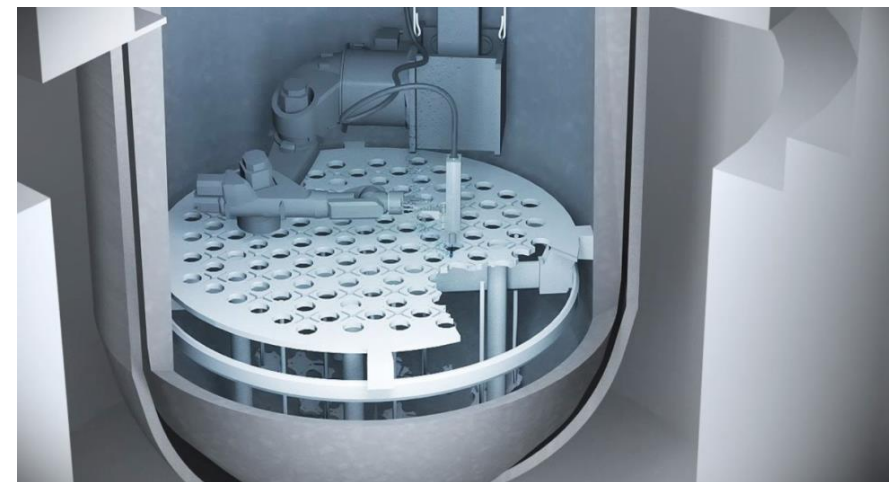

# LD-SAFE Concept

## LD-SAFE project

Laser cutting to replace conventional cutting techniques for the dismantling of commercial reactor components

### Advantages of cutting laser technology

Effortless cutting and excellent cutting performances  
Minimization of the secondary waste produced

Easily automatized with a manipulator in remote operation  
Safe for the operation and maintenance workers

Modular system  
Easily installed in existing facilities

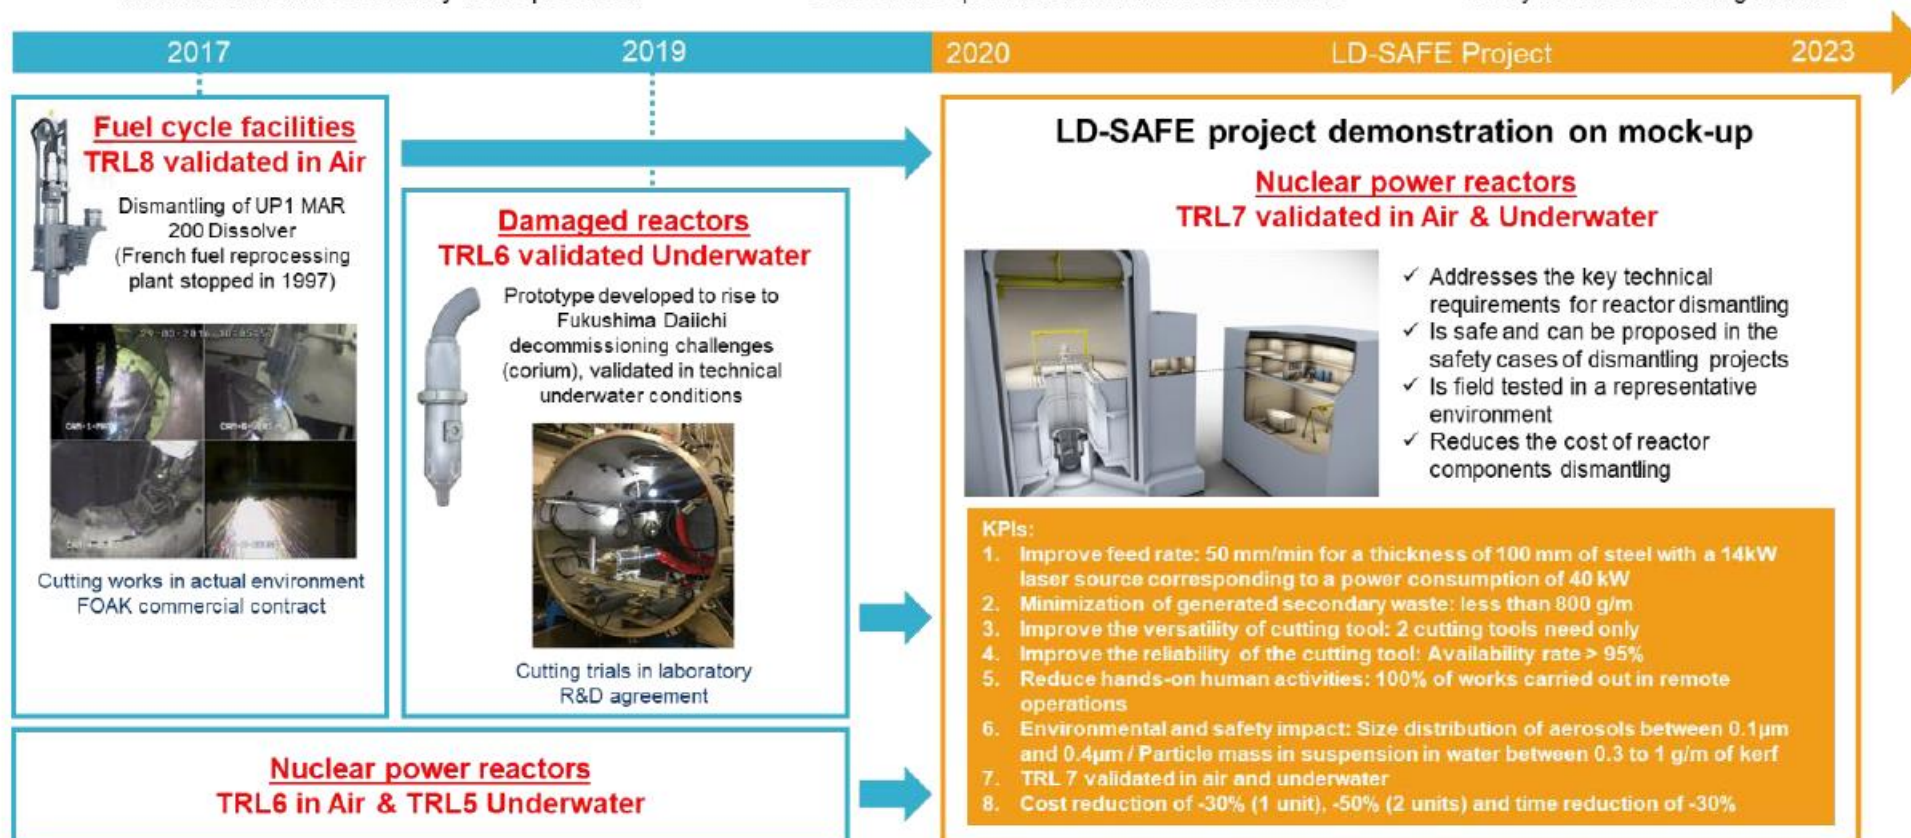

# LD-SAFE

## Main technical activities

Laser Cutting Development

Environmental and worker protection

Safety Assessment

Decommissioning of nuclear facilities

**Analysis of the reactor dismantling with laser cutting**

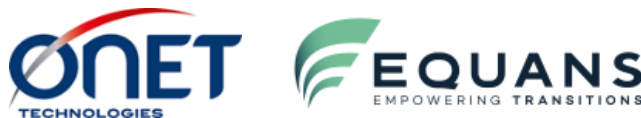

**Laboratory tests and calculations:**

-Laser beam residual power  
-Hydrogen gas generation during underwater cutting

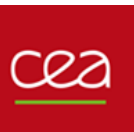

-Aerosols  
IRSN  
INSTITUT DE RADIOPROTECTION ET DE SÛRETÉ NUCLÉAIRE

**-Technology qualification**

**-Guidelines for the industry for the use of laser cutting**

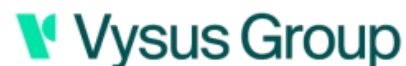

**-Risk analysis  
-Generic Safety Assessment**

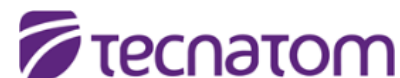

**-Independent review**

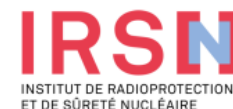

**Demonstrators in two phases: in air and underwater**

**Validation of the implantation and the use of the laser cutting technology in operational environment**

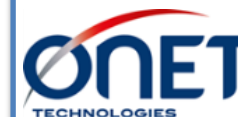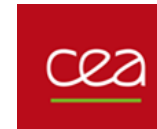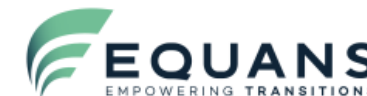

**+ End-users**

# LD-SAFE

## Safety aspects

### Preliminary risk analysis performed

- Identifying and evaluating radiological and conventional risks,
- Identifying safety systems, measures and controls,
- Identifying uncertainties.

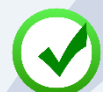

**Risk Analysis  
(preliminary)**

**Compilation of  
WP2/WP3  
results**

Referencia para  
potenciales  
usuarios finales

**Generic Safety  
Assessment**

**Independent  
review (IRSN)**

*(Regulator  
submittal)*

**WP5,  
Demostrator**

- **WP2, Laboratory Tests** : H<sub>2</sub> and aerosols generation, and residual laser beam power
- **WP3, Workers and environment protection**

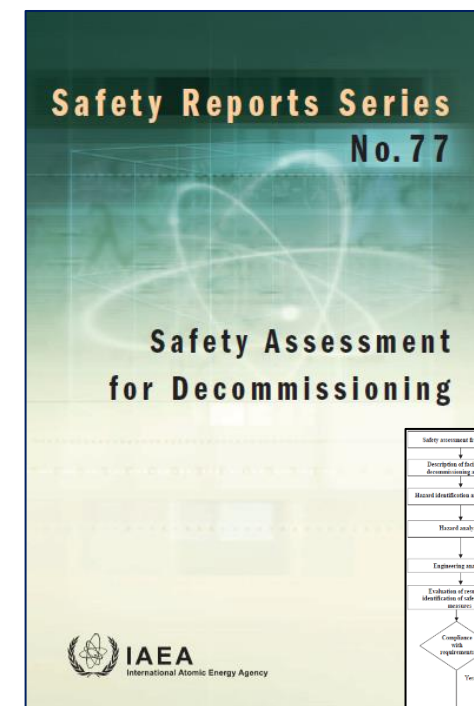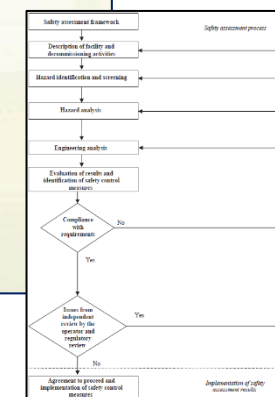

# LD-SAFE

## Safety aspects

## Risk Matrixes for Normal and Accident Conditions - "Safety Envelope"

### Normal segmentation conditions

| Situation                                          | Associated Activities                                              | Potential Causes                                                                                                                                                                                                          | Unoptimized Conditions     |                                                                      |                |             | Safety Measures and Controls                                                                                                                                                                                                                                              |
|----------------------------------------------------|--------------------------------------------------------------------|---------------------------------------------------------------------------------------------------------------------------------------------------------------------------------------------------------------------------|----------------------------|----------------------------------------------------------------------|----------------|-------------|---------------------------------------------------------------------------------------------------------------------------------------------------------------------------------------------------------------------------------------------------------------------------|
|                                                    |                                                                    |                                                                                                                                                                                                                           | Probability <sup>(1)</sup> | Dose to Workers                                                      | Dose to Public | Environment | Design options                                                                                                                                                                                                                                                            |
| External Exposure<br>Normal conditions             | All activities                                                     | Activities in radiation and contaminated areas.                                                                                                                                                                           | All along the process      | Very high if no measures are taken due to highly activated materials | Low            | N/A         | Remote Operation, robust design, easy installation & decontamination. Shielding, dosimeters, and other Radiation Protection (RP) procedures and controls. Area Radiation Monitoring. Water Level Monitoring. Building off-gas system monitoring and filtration. Training. |
| Internal Exposure<br>Normal conditions             | Segmentation activities                                            | Airborne releases during RPV/RVI cutting. Sublimation of ruthenium to gaseous form (in-air cutting).                                                                                                                      | All along the process      | Very low                                                             |                | N/A         | Remote Operation. Dust/aerosols collection system. Contamination Control Confinement (Airlock). Area Radiation Monitoring. Building off-gas system monitoring and filtration.                                                                                             |
| Effluents and secondary waste<br>Normal conditions | Segmentation activities                                            | Airborne releases, dross generation, and water contamination during RPV/RVI cutting.                                                                                                                                      | All along the process      | N/A                                                                  | N/A            | Very Low    | Protection of cavity floor. Effluents Monitoring. Auxiliary water filtration systems.                                                                                                                                                                                     |
| Waste management<br>Normal conditions              | Radioactive waste handling and fluxes                              | Cutting pattern choice                                                                                                                                                                                                    | All along the process      | Very low                                                             | N/A            | N/A         | Minimize waste generation. Shielding. Online removal of waste. Optimization of waste location considering personnel walking paths.                                                                                                                                        |
| Hazardous materials exposure<br>Normal conditions  | Segmentation activities                                            | Potential generation of hazardous chemical compounds during cutting operations, such as ozone, carbon oxides, nickel carbonyl, nitrogen oxide and toluene. Hexavalent chromium generation during stainless steel cutting. | All along the process      | N/A                                                                  | N/A            | Toxicity    | Dust/aerosols collection system. Contamination Control Confinement (Airlock). Area Radiation Monitoring.                                                                                                                                                                  |
| Maintenance operation<br>Normal conditions         | Maintenance (nozzle replacement, support equipment - platform-...) | Maintenance activities, repairs, and replacements.                                                                                                                                                                        | All along the process      | Low                                                                  | N/A            | N/A         | Robust design, easy and scarce maintenance. RP procedures and controls. Protective personal equipment.                                                                                                                                                                    |

# LD-SAFE

## Safety aspects

- **WP2.** Tests and calculations of hydrogen and aerosols generation, and of residual laser beam power (performed in DELIA Facility at CEA Saclay).
- **WP3.** System maturity and integration analysis.
- **WP5.** Demonstration of laser cutting technology safety and efficiency in mock-up (reactor components and conditions simulation).

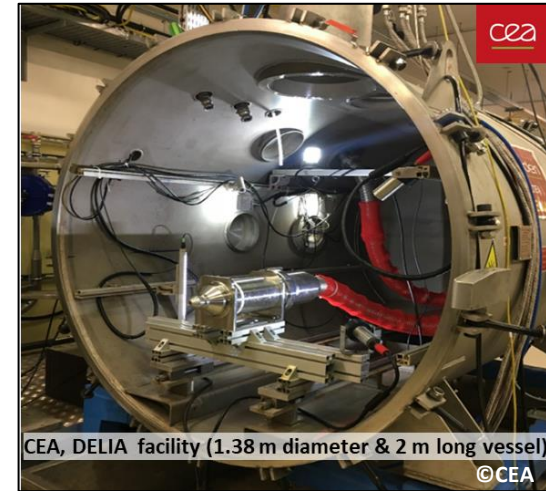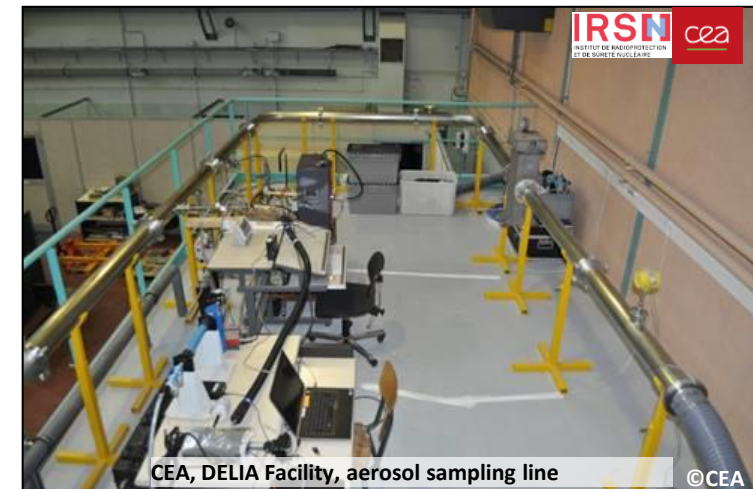

## Expected impact

- ☐ To support the **European industry** by enhancing the decommissioning sector based on EU safety culture and know-how.
- ☐ To propose an **innovation** (in terms of safety, economic and technical aspects)
- ☐ Improving the segmentation of RPV/RVI

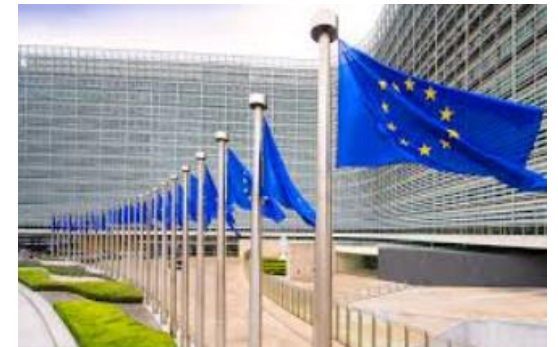

**Achieving a world first laser dismantling of a power nuclear reactor!**

# Thank you!

## Q&A

## Upcoming events

- **WNE 2021** - LD-SAFE workshop public session  
Dec. 1, 2021 - Paris, France

## Follow us

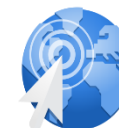

<https://ldsafe.eu/>

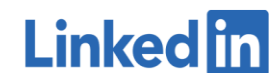

LD-SAFE Project

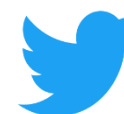

@ld\_safe
